# Supplementary material
Source: Springer Nature journal article supplement (https://www.springermedizin.de/resource/supplementary/12916_2011_430_MOESM2_ESM.pdf/9599942)

melanoma

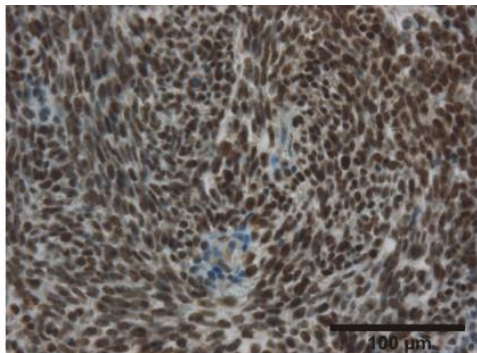

cutaneous  
neurofibroma

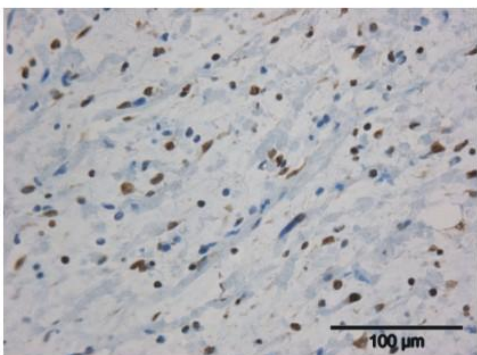

plexiform  
neurofibroma

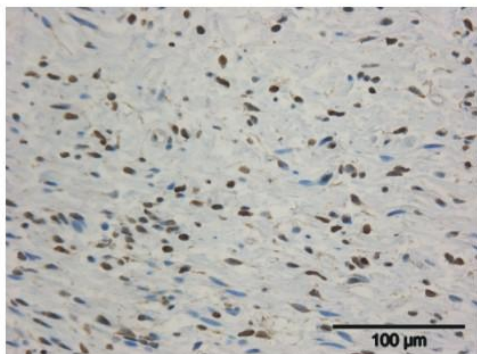

MPNST

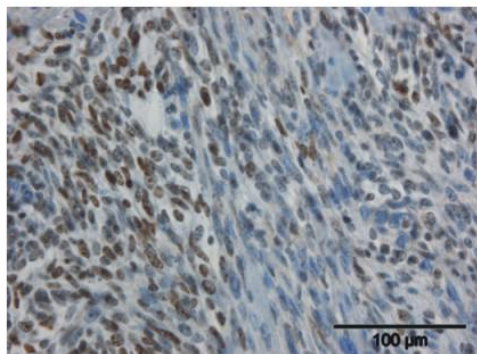

Supplement: MOESM2 [file 9599942]
